# Supplementary material for: The potential role of Osteopontin in the maintenance of commensal bacteria homeostasis in the intestine
Source: PubMed Central journal article supplement (PMC5351998; doi:10.1371/journal.pone.0173629), 2017-03-15

## **S4 Fig. Schematic diagram of the possible role of Opn in the regulation of intestinal microflora**

(Left) In the normal intestine of WT mice, TCR $\gamma\delta^+$ CD8 T cells express Opn.

Intracellular Opn contributes to the survival of these cells. TCR $\gamma\delta^+$ CD8 T cells also express various types of antimicrobial factors resulting in the regulation of intestinal

microflora. (Right) In Opn KO mice, IEL TCR $\gamma\delta^+$ CD8 T cells were decreased due to a

lack of Opn-mediated survival signals. As a consequence, the total amounts of

antimicrobial factors were reduced, resulting in the alteration of the microflora.

S4 Fig

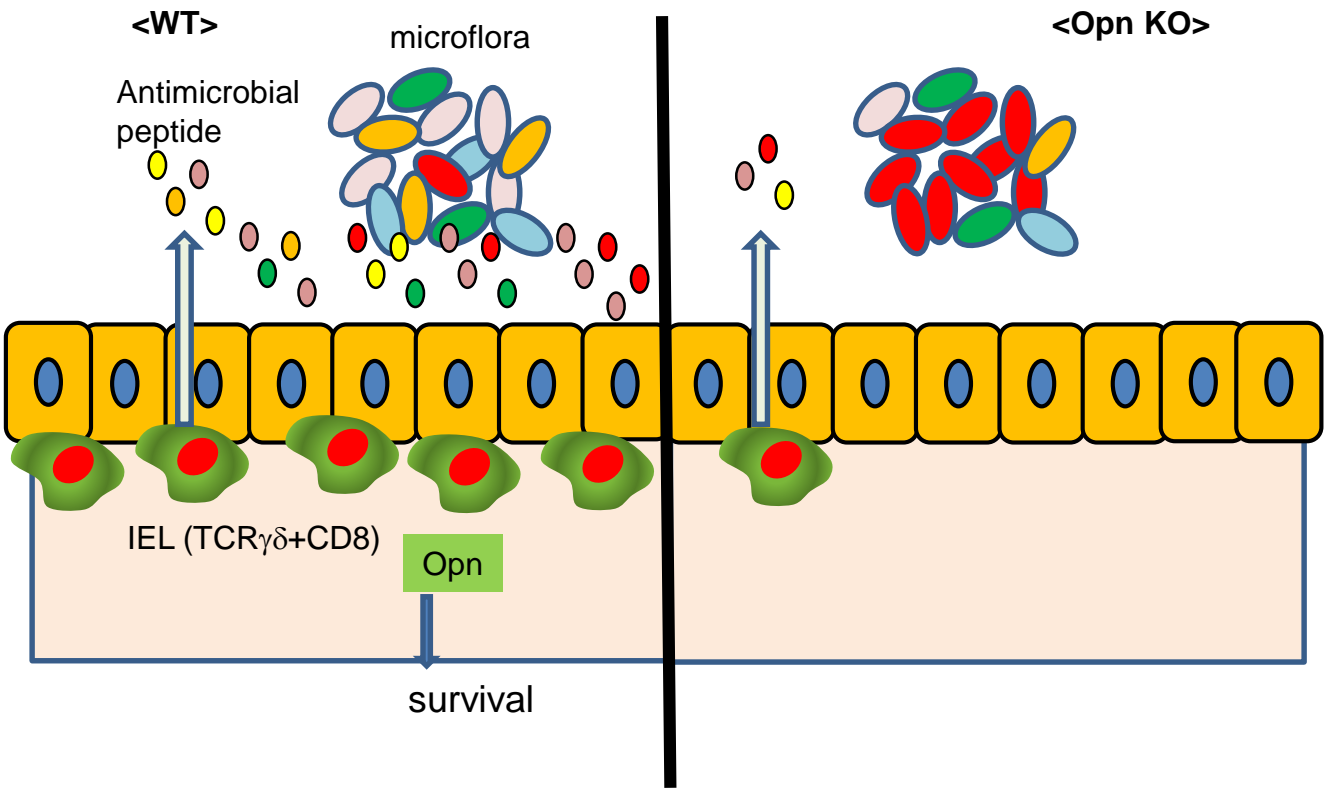

Supplement: pone.0173629.s004.pdf [file pone.0173629.s004.pdf]
